# Supplementary material for: Chemical control of photochromism and a multiresponsive molecular switch based on a diarylethene derivative containing naphthol
Source: Royal Society of Chemistry journal article supplement (doi:10.1039/c4pp00093e), 2014-09-29
Supplement: c4pp00093e1.pdf [file c4pp00093e1.pdf]

## Supporting Information

# Chemical control of photochromism and a multiresponsive molecular switch based on a diarylethene derivative containing naphthol

Wenju Liu, Ziyong Li, Fang Hu, Jun Yin \*, Guang-Ao Yu , Sheng Hua Liu\*

Key Laboratory of Pesticide and Chemical Biology, Ministry of Education, College of Chemistry,  
Central China Normal University, Wuhan 430079, PR China

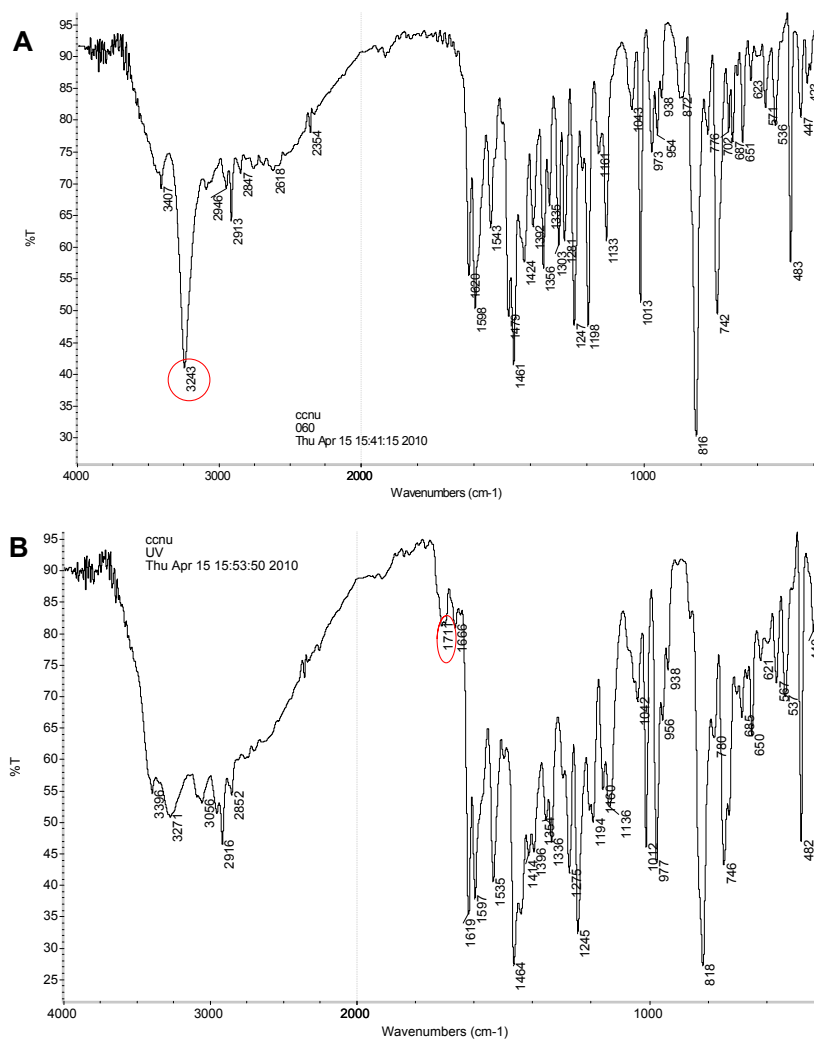

**Figure S1:** IR spectrum of diarylethene DIN before and after UV irradiation.(A: IR spectrum before UV irradiation; B: IR spectrum after UV irradiation).

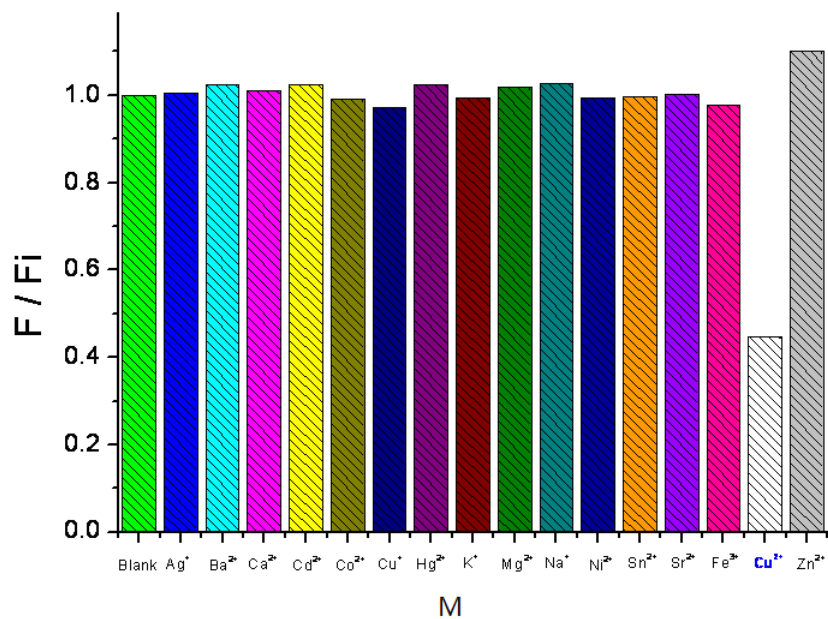

**Figure S2:** Fluorescence responses of **DIN** to various ions in acetonitrile ( $c = 2 \times 10^{-5}$  mol/L).  $F/F_i$  represents the final integrated emission ( $F$ ) over initial integrated fluorescence response ( $F_i$ ).

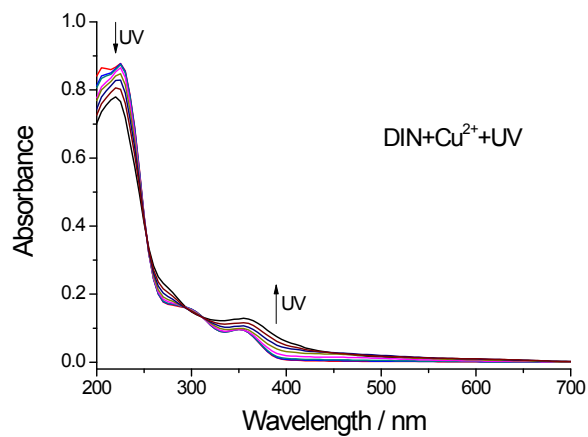

**Figure S3:** Optical response of diarylethene **DIN** in acetonitrile upon the addition of  $Cu^{2+}$  after irradiation with 302 nm.

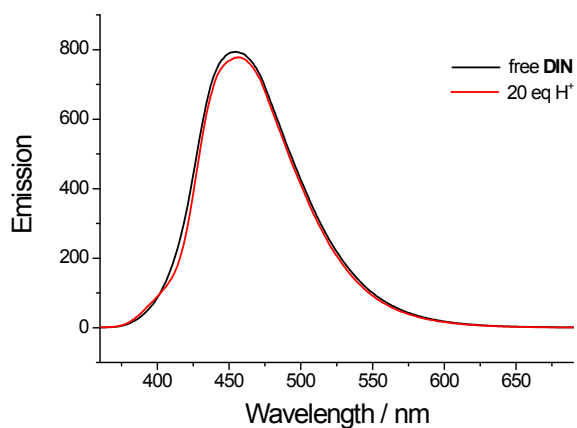

**Figure S4:** Fluorescence responses of diarylethene **DIN** in acetonitrile ( $c = 2 \times 10^{-5}$  mol/L) upon protonation with HCl (20 eq).

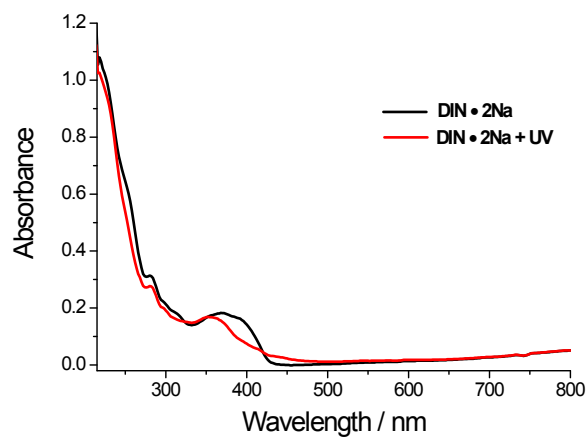

**Figure S5:** Absorbance responses of diarylethene **DIN•2Na** in acetonitrile ( $c = 2 \times 10^{-5}$  mol/L) upon the addition of NaOH (10 eq) upon irradiation with UV light.

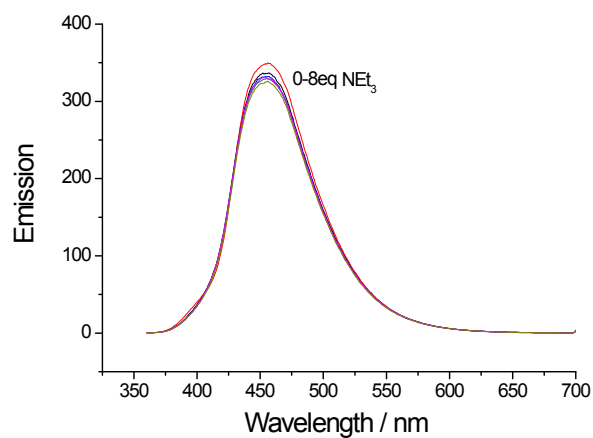

**Figure S6:** Fluorescence responses of diarylethene **DIN** in acetonitrile ( $c = 2 \times 10^{-5}$  mol/L) upon the addition of NEt<sub>3</sub> (0-8 eq).

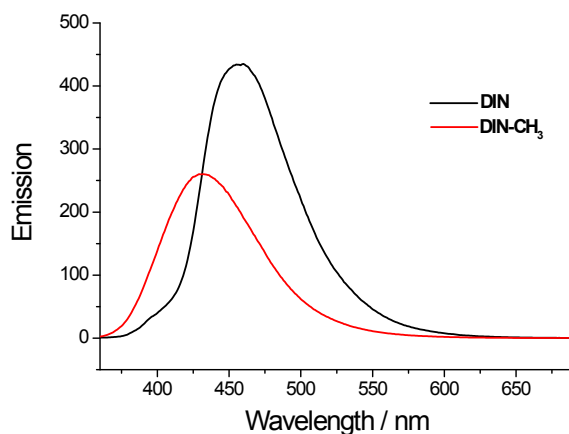

**Figure S7:** Fluorescence changes of diarylethenes **DIN** and **DIN•CH<sub>3</sub>** in acetonitrile ( $c = 2 \times 10^{-5}$  mol/L) before irradiation with UV light.

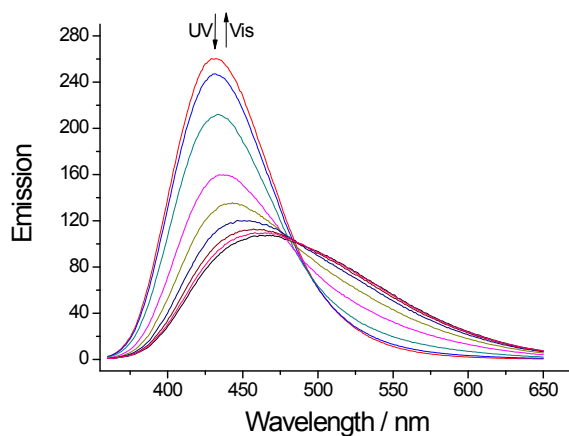

**Figure S8:** Fluorescence responses of diarylethene **DIN•CH<sub>3</sub>** in acetonitrile ( $c = 2 \times 10^{-5}$  mol/L) upon irradiation with UV and visible light.

**Table S1:** Crystal data and structure refinement parameters for **DIN**.

| <b>DIN</b>        |                            |
|-------------------|----------------------------|
| Empirical formula | $C_{23}H_{16}Cl_2N_2O S_2$ |
| Formula weight    | 471.40                     |
| Temperature       | 298(2) K                   |
| Wavelength        | 0.71073 Å                  |
| Crystal system    | Orthorhombic               |
| Space group       | P2(1)2(1)2(1)              |
| a (Å)             | 7.366(4)                   |
| b (Å)             | 8.121(4)                   |

|                                   |                                             |
|-----------------------------------|---------------------------------------------|
| c (Å)                             | 36.109(17)                                  |
| $\alpha$ (deg)                    | 90                                          |
| $\beta$ (deg)                     | 90                                          |
| $\gamma$ (deg)                    | 90                                          |
| Volume(Å <sup>3</sup> )           | 2160.0(18)                                  |
| Z                                 | 4                                           |
| Density (calculated)              | 1.450 Mg/m <sup>3</sup>                     |
| Absorption coefficient            | 0.512 mm <sup>-1</sup>                      |
| F(000)                            | 968                                         |
| Crystal size                      | 0.20 × 0.10 × 0.10 mm <sup>3</sup>          |
| Theta range for data collection   | 2.57 to 25.99°.                             |
| Index ranges                      | -9<=h<=8, -9<=k<=9, -44<=l<=19              |
| Reflections collected             | 9666                                        |
| Independent reflections           | 4173 [R(int) = 0.1408]                      |
| Completeness to theta = 26.00     | 99.6 %                                      |
| Absorption correction             | None                                        |
| Max. and min. transmission        | 0.9506 and 0.9045                           |
| Refinement method                 | Full-matrix least-squares on F <sup>2</sup> |
| Data / restraints / parameters    | 4173 / 0 / 274                              |
| Goodness-of-fit on F <sup>2</sup> | 1.072                                       |
| Final R indices [I>2sigma(I)]     | R1 = 0.0721, wR2 = 0.1689                   |
| R indices (all data)              | R1 = 0.0999, wR2 = 0.1774                   |
| Largest diff. peak and hole       | 0.294 and -0.309 e <sup>-3</sup>            |

---
